# Supplementary material for: PSReliP: an integrated pipeline for analysis and visualization of population structure and relatedness based on genome-wide genetic variant data
Source: Research Square preprint supplement (doi:10.21203/rs.3.rs-2106876/v1), 2022-09-29
Supplement: Supplementary file 1 [file d912669ddca3468501cec872.xlsx]

## Sheet: Table1
Parameters	Parameters description	Details	Possible values of parameters	Default values in the pipeline	Required/Optional/Ignored
PLINK_HOME	Path to the PLINK executable files	Specify the full path to the executable of PLINK 1.9 (plink_linux_x86_64_20201019.zipa).	not empty string	there is no default value	required
PLINK2_HOME	Path to the PLINK executable files	Specify the full path to the executable of PLINK 2.0 (Alpha 2.3 final 24 Jan 2020a).	not empty string	there is no default value	required
PLINK2_DEV_HOME	Path to the PLINK executable files	Specify the full path to the executable of the development version of PLINK 1.9 (plink2_linux_x86_64_20210608.zipa).	not empty string	there is no default value	required
TOOL_INSTALL_DIR	Installation Directory	Specify the path to the directory where you installed the tool.	not empty string	there is no default value	required
WD	Working Directory	Specify the path to the directory where the analysis results and log files will be saved.	not empty string	there is no default value	required
VCF_FILE_NAME	Path to the genotype input file	Specify the path to the genotype input file in '.vcf/.vcf.gz/.bcf' formats.	not empty string	there is no default value	required
SAMPLES_ID_FOR_ANA	Path to the file that lists the samples	Specify the path to the file with the list of IDs, names, and groups of samples that you want to include in the analysis.	string	empty string by default	optional; ignored if $SAM_SELECT_FLAG is equal to 0 and $SAM_ANOTHER_NAME_FLAG is equal to 0 and $CLUSTERING_FLAG is equal to 1
SHINY_APP_DIR	Path to the output directory for the Shiny application	Specify the path to the directory where the Shiny application will be saved.	not empty string	there is no default value	required
EXTRA_CHR_FLAG	Flag to allow unrecognized chromosome codes (PLINK's --allow-extra-chr flag)	The flag that allows the user to refer to extra chromosome codes by name.	integer 0 or 1 (--allow-extra-chr flag is used)	default value: 1	required
NUMBER_OF_CHROMOSOMES	Number of chromosomes	Specify the number of chromosomes that you want included in the analysis.	non negative integer	default value: 0	optional if $EXTRA_CHR_FLAG is equal to 0; ignored if $EXTRA_CHR_FLAG is equal to 1
SNP_ONLY_FLAG	Keep only SNPs (PLINK's --snps-only flag)	--snps-only' excludes all variants with one or more multi-character allele codes.b	integer 0 or 1 (--snps-only flag is used)	default value: 0	required
GENO_VAL	Missing genotype rates (PLINK's --geno [maximum per-variant])	--geno' filters out all variants with missing call rates exceeding the provided value (default 0.1) to be removed.b	decimal numbers from 0 to 1 (in PLINK 2.0 the default is 0.1)	default value: 0.2	required
MIND_VAL	Missing genotype rates (PLINK's --geno [maximum per-sample])	Exclude samples (--mind) with missing call frequencies greater than a threshold (default 0.1)c	decimal numbers from 0 to 1 (in PLINK 2.0 the default is 0.1)	default value: 0.2	required
MAF_VAL	Allele frequencies	--maf' filters out all variants with allele frequency below the provided threshold (default 0.01).b	decimal numbers from 0 to 1 (in PLINK 2.0 the default is 0.01)	default value: 0.05	required
IMPUTATION_FLAG	Mean-imputes missing genotype calls (for PLINK's --pca and --make-rel flags)	Use the 'meanimpute' modifier to request mean-imputes for missing genotype calls for the standard computation.b	integer 0 (--pca; --make-rel) or 1 (--pca meanimpute; --make-rel meanimpute)	default value: 1	required
LD_PRUNING_FLAG	Linkage disequilibrium (variant pruning)	--indep-pairwise' command produces a pruned subset of variants that are in approximate linkage equilibrium with each other.b	integer 0 or 1 (--indep-pairwise flag is used)	default value: 1	required
LD_WINDOW_SIZE	Linkage disequilibrium (window size)	Window size in variant count or kilobase (if the 'kb' modifier is present) units.b	non negative integer	default value: 100	required if $LD_PRUNING_FLAG is equal to 1; ignored if $LD_PRUNING_FLAG is equal to 0
LD_WINDOW_SIZE_UNITS	Linkage disequilibrium (window size units)	Window size units: vriant count ('vc') or kilobase ('kb') units.b	string: "vc" (variant count) or"kb" (kilobase)	default value: "vc"	required if $LD_PRUNING_FLAG is equal to 1; ignored if $LD_PRUNING_FLAG is equal to 0
LD_STEP_SIZE	Linkage disequilibrium (variant count)	Variant count to shift the window at the end of each step (default 1, and now required to be 1 when a kilobase window is used)b	non negative integer	default value: 1	optional if $LD_PRUNING_FLAG is equal to 1; ignored if $LD_PRUNING_FLAG is equal to 0
LD_THRESHOLD	Linkage disequilibrium (r2 threshold)	Pairs of variants with squared correlation greater than the threshold are pruned from the window until no such pairs remain.b	decimal numbers from 0 to 1	default value: 0.2	required if $LD_PRUNING_FLAG is equal to 1; ignored if $LD_PRUNING_FLAG is equal to 0
CLUSTERING_FLAG	Hierarchical clustering (PLINK's --cluster flag)	--cluster' uses IBS values to perform complete linkage clustering.d	integer 0 (groups provided by user are used) or 1 (hierarchical clustering is used)	default value: 1	required
CLUSTER_K	Hierarchical clustering (clustering constraints)	--cluster --K <minimum final cluster count>' --K stops cluster merging once there are no more than the given number of clusters remaining.d	non negative integer	default value: 2	required if $CLUSTERING_FLAG is equal to 1; ignored if $CLUSTERING_FLAG is equal to 0
SAM_SELECT_FLAG	Sample selection	Set to 0 to use all samples for which data is present in the genotype input file, and set to 1 to use only selected samples.	integer 0 (all samples) or 1 (only selected samples)	default value: 0	optional
SAM_ANOTHER_NAME_FLAG	Setting sample names	Set to 0 to identify the samples by IDs used in the genotype input file, and set to 1 to use the sample names other than sample IDs.	integer 0 (IDs from the genotype input file) or 1 (sample names other than sample IDs)	default value: 0	optional
PLOTLY_IMAGE_FORMAT	Types of image file formats	Set the image file format to export the plot as a static image.	string ( one of the following: png, jpeg, webp, svg, pdf)	default value: "jpeg"	required
OUTPUT_PREFIX	Shiny application name	Specify the Shiny app directory name: this name will be part of the URL of the Shiny application.	not empty string	default value: "app_name"	required
MAX_MEM_USAGE	System resource usage (PLINK's --memory flag)	Set size, in MB, of initial workspace malloc attempt.c 32-bit PLINK limits workspace size to roughly 2 GB.d	non negative integer	default value: 2000	required

## Sheet: Table2
BioSample			BioProject accessionb	SRA
BioSample accessiona	Organism	Cultivar/Sample name		Sample accessionc	Run accessionc
SAMD00003725	Oryza sativa (rice)	Takanari	PRJDB1948	DRS016042	DRR018360
SAMD00003726	Oryza sativa (rice)	Tachiaoba	PRJDB1948	DRS016040	DRR018358
SAMD00003727	Oryza sativa (rice)	Mizuhochikara	PRJDB1948	DRS016038	DRR018356
SAMD00003728	Oryza sativa (rice)	Suweon258	PRJDB1948	DRS016039	DRR018357
SAMD00003729	Oryza sativa (rice)	Tachisugata	PRJDB1948	DRS016041	DRR018359
SAMD00003730	Oryza sativa (rice)	Hokuriku193	PRJDB1948	DRS016037	DRR018355
SAMD00004056	Oryza sativa Indica Group (long-grained rice)	Kasalath	PRJDB933	DRS007576	DRR008446-DRR008447
SAMD00004172	Oryza rufipogon	W0630	PRJDB2009	DRS000746	DRR001185
SAMD00009825	Oryza sativa Japonica Group (Japanese rice)	OMACHI	PRJDA56069	DRS000412	DRR000719-DRR000720
SAMD00010631	Oryza sativa Japonica Group (Japanese rice)	Moroberekan	PRJDB710	DRS003096	DRR003661
SAMD00010632	Oryza sativa Japonica Group (Japanese rice)	Koshihikari	PRJDB710	DRS003095	DRR003656-DRR003657,DRR003660
SAMD00010633	Oryza sativa Japonica Group (Japanese rice)	Yamadanishiki	PRJDB710	DRS003091	DRR003652;DRR003655
SAMD00010634	Oryza sativa Japonica Group (Japanese rice)	Norin8	PRJDB710	DRS003094	DRR003650-DRR003651;DRR003659
SAMD00010635	Oryza sativa Japonica Group (Japanese rice)	Gohyakumangoku	PRJDB710	DRS003092	DRR003653-DRR003654
SAMD00010636	Oryza sativa Japonica Group (Japanese rice)	Kameji	PRJDB710	DRS003093	DRR003648-DRR003649;DRR003658
SAMD00013510	Oryza sativa Japonica Group (Japanese rice)	Hitomebore	PRJDB2645	DRS003820	DRR004451-DRR004453
SAMD00016906	Oryza sativa Japonica Group (Japanese rice)	Kitaake	PRJDB2868	DRS059739	DRR125602
SAMD00045947	Oryza sativa Japonica Group (Japanese rice)	Koshihikari	PRJDB4518	DRS029963	DRR054198
SAMD00045965	Oryza sativa Japonica Group (Japanese rice)	Nipponbare	PRJDB4518	DRS029981	DRR054216
SAMD00077979	Oryza sativa Japonica Group (Japanese rice)	Koshihikari	PRJDB5651	DRS060700	DRR099981
SAMD00077980	Oryza sativa Japonica Group (Japanese rice)	Hoshinoyume	PRJDB5651	DRS060701	DRR099982
SAMD00077981	Oryza sativa Japonica Group (Japanese rice)	Hitomebore	PRJDB5651	DRS060702	DRR099983
SAMD00077982	Oryza sativa Japonica Group (Japanese rice)	Tentakaku	PRJDB5651	DRS060703	DRR099984
SAMD00077983	Oryza sativa Japonica Group (Japanese rice)	Tenkomori	PRJDB5651	DRS060704	DRR099985
SAMD00077984	Oryza sativa Japonica Group (Japanese rice)	Hinohikari	PRJDB5651	DRS060705	DRR099986
SAMD00077985	Oryza sativa Japonica Group (Japanese rice)	Genkitsukushi	PRJDB5651	DRS060706	DRR099987
SAMD00077986	Oryza sativa Japonica Group (Japanese rice)	Koshihikari-SBL1	PRJDB5651	DRS060707	DRR099988
SAMD00077987	Oryza sativa Japonica Group (Japanese rice)	Nipponbare	PRJDB5651	DRS060708	DRR099989
SAMD00077988	Oryza sativa Indica Group (long-grained rice)	Kasalath	PRJDB5651	DRS060709	DRR099990
SAMD00078852	Oryza sativa Indica Group (long-grained rice)	Tupa 121-3	PRJDB5706	DRS062105	DRR093954-DRR093956
SAMD00078853	Oryza sativa Indica Group (long-grained rice)	Bei Khe	PRJDB5706	DRS062106	DRR093957-DRR093959
SAMD00078854	Oryza sativa Indica Group (long-grained rice)	Nona Bokra	PRJDB5706	DRS062107	DRR093961-DRR093962
SAMD00078855	Oryza sativa Japonica Group (Japanese rice)	LAC 23	PRJDB5706	DRS062108	DRR093963-DRR093964
SAMD00078856	Oryza sativa Japonica Group (Japanese rice)	Khau Mac Kho	PRJDB5706	DRS062109	DRR093965-DRR093966
SAMD00078857	Oryza sativa Japonica Group (Japanese rice)	Khao Nam Jen	PRJDB5706	DRS062110	DRR093967-DRR093969
SAMD00078858	Oryza sativa Japonica Group (Japanese rice)	Hayamasari	PRJDB5706	DRS062111	DRR093970
SAMD00080139	Oryza sativa (rice)	Akidawara	PRJDB5765	DRS075303	DRR092498
SAMD00080141	Oryza sativa Indica Group (long-grained rice)	Ruriaoba	PRJDB5765	DRS075305	DRR092500
SAMD00116538	Oryza glaberrima x Oryza sativa	NERICA 3	PRJDB6967	DRS062762	DRR128976
SAMD00116539	Oryza glaberrima x Oryza sativa	NERICA 4	PRJDB6967	DRS062763	DRR128977
SAMD00116540	Oryza glaberrima x Oryza sativa	NERICA 5	PRJDB6967	DRS062764	DRR128978
SAMD00116541	Oryza glaberrima x Oryza sativa	NERICA 7	PRJDB6967	DRS062765	DRR128979
SAMD00116542	Oryza sativa Japonica Group (Japanese rice)	WAB 56-104	PRJDB6967	DRS062766	DRR128980
SAMD00116543	Oryza glaberrima (African rice)	CG 14	PRJDB6967	DRS062767	DRR128981
SAMEA104459802	Oryza rufipogon	W0123-1	PRJEB19404	ERS2077744	ERR2240123
SAMEA104459803	Oryza sativa (rice)	W3105-1	PRJEB19404	ERS2077745	ERR2240124
SAMEA104459804	Oryza rufipogon	W3095-2	PRJEB19404	ERS2077746	ERR2240125
SAMEA104459805	Oryza rufipogon	W3078-2	PRJEB19404	ERS2077747	ERR2240126
SAMEA104459806	Oryza sativa (rice)	KY131	PRJEB19404	ERS2077748	ERR2240127
SAMEA104459807	Oryza sativa (rice)	WYG7	PRJEB19404	ERS2077749	ERR2240128
SAMEA104460747	Oryza sativa (rice)	UR28	PRJEB19404	ERS2078689	ERR2241054
SAMEA104460749	Oryza sativa (rice)	LG31	PRJEB19404	ERS2078691	ERR2241055
SAMEA104460751	Oryza sativa (rice)	Koshihikari	PRJEB19404	ERS2078693	ERR2241056
SAMEA104460752	Oryza sativa (rice)	Kasalath	PRJEB19404	ERS2078694	ERR2241057
SAMEA104460753	Oryza sativa (rice)	IL9	PRJEB19404	ERS2078695	ERR2241058
SAMEA104460759	Oryza sativa (rice)	HP517-1	PRJEB19404	ERS2078701	ERR2241060
SAMEA104467886	Oryza sativa (rice)	DHX2	PRJEB19404	ERS2085828	ERR2242620
SAMEA104467887	Oryza sativa (rice)	Gla4	PRJEB19404	ERS2085829	ERR2242621
SAMEA104467888	Oryza sativa (rice)	GP295-1	PRJEB19404	ERS2085830	ERR2242622
SAMEA104467889	Oryza sativa (rice)	GP761-1	PRJEB19404	ERS2085831	ERR2242623
SAMEA104467890	Oryza sativa (rice)	GP772-1	PRJEB19404	ERS2085832	ERR2242624
SAMEA104467891	Oryza sativa (rice)	HP13-2	PRJEB19404	ERS2085833	ERR2242625
SAMEA104467892	Oryza sativa (rice)	HP362-2	PRJEB19404	ERS2085834	ERR2242626
SAMEA104469216	Oryza sativa (rice)	GP124	PRJEB19404	ERS2087158	ERR2245512
SAMEA104469217	Oryza sativa (rice)	GP22	PRJEB19404	ERS2087159	ERR2245513
SAMEA104469219	Oryza sativa (rice)	GP39	PRJEB19404	ERS2087161	ERR2245515
SAMEA104469220	Oryza sativa (rice)	GP51	PRJEB19404	ERS2087162	ERR2245516
SAMEA104469221	Oryza sativa (rice)	GP536	PRJEB19404	ERS2087163	ERR2245517
SAMEA104469222	Oryza sativa (rice)	GP540	PRJEB19404	ERS2087164	ERR2245518
SAMEA104469223	Oryza sativa (rice)	GP551	PRJEB19404	ERS2087165	ERR2245519
SAMEA104469224	Oryza sativa (rice)	GP567	PRJEB19404	ERS2087166	ERR2245520
SAMEA104469226	Oryza sativa (rice)	GP640	PRJEB19404	ERS2087168	ERR2245522
SAMEA104469227	Oryza sativa (rice)	GP669	PRJEB19404	ERS2087169	ERR2245523
SAMEA104469228	Oryza sativa (rice)	GP677	PRJEB19404	ERS2087170	ERR2245524
SAMEA104469229	Oryza sativa (rice)	GP72	PRJEB19404	ERS2087171	ERR2245525
SAMEA104469231	Oryza sativa (rice)	HP103	PRJEB19404	ERS2087173	ERR2245527
SAMEA104469232	Oryza sativa (rice)	HP119	PRJEB19404	ERS2087174	ERR2245528
SAMEA104469233	Oryza sativa (rice)	HP14	PRJEB19404	ERS2087175	ERR2245529
SAMEA104469237	Oryza sativa (rice)	HP327	PRJEB19404	ERS2087179	ERR2245533
SAMEA104469238	Oryza sativa (rice)	HP38	PRJEB19404	ERS2087180	ERR2245534
SAMEA104469239	Oryza sativa (rice)	HP383	PRJEB19404	ERS2087181	ERR2245535
SAMEA104469240	Oryza sativa (rice)	HP390	PRJEB19404	ERS2087182	ERR2245536
SAMEA104469241	Oryza sativa (rice)	HP396	PRJEB19404	ERS2087183	ERR2245537
SAMEA104469242	Oryza sativa (rice)	HP407	PRJEB19404	ERS2087184	ERR2245538
SAMEA104469243	Oryza sativa (rice)	HP44	PRJEB19404	ERS2087185	ERR2245539
SAMEA104469244	Oryza sativa (rice)	rice HP45	PRJEB19404	ERS2087186	ERR2245540
SAMEA104469246	Oryza sativa (rice)	HP486	PRJEB19404	ERS2087188	ERR2245542
SAMEA104469247	Oryza sativa (rice)	HP492	PRJEB19404	ERS2087189	ERR2245543
SAMEA104469248	Oryza sativa (rice)	HP577	PRJEB19404	ERS2087190	ERR2245544
SAMEA104469250	Oryza sativa (rice)	Nipponbare	PRJEB19404	ERS2087192	ERR2245546
SAMEA104469251	Oryza sativa (rice)	W0128	PRJEB19404	ERS2087193	ERR2245547
SAMEA104469252	Oryza rufipogon	W0141	PRJEB19404	ERS2087194	ERR2245548
SAMEA104469253	Oryza rufipogon	common wild rice W0170	PRJEB19404	ERS2087195	ERR2245549
SAMEA104469254	Oryza rufipogon	common wild rice W1687	PRJEB19404	ERS2087196	ERR2245550
SAMEA104469255	Oryza rufipogon	common wild rice W1698	PRJEB19404	ERS2087197	ERR2245551
SAMEA104469256	Oryza rufipogon	common wild rice W1739	PRJEB19404	ERS2087198	ERR2245552
SAMEA104469257	Oryza rufipogon	common wild rice W1754	PRJEB19404	ERS2087199	ERR2245553
SAMEA104469258	Oryza rufipogon	common wild rice W1777	PRJEB19404	ERS2087200	ERR2245554
SAMEA104469259	Oryza rufipogon	common wild rice W1943	PRJEB19404	ERS2087201	ERR2245555
SAMEA104469260	Oryza rufipogon	common wild rice W1979	PRJEB19404	ERS2087202	ERR2245556
SAMEA104469261	Oryza rufipogon	common wild rice W2012	PRJEB19404	ERS2087203	ERR2245557
SAMEA2015633	Oryza sativa Japonica Group (Japanese rice)	Dongjin	PRJEB3152, PRJEB3192	ERS156003	ERR157947
SAMEA2016954	Oryza sativa Japonica Group (Japanese rice)	HY-04	PRJEB3178	ERS159144	ERR161560
SAMEA2017052	Oryza sativa Japonica Group (Japanese rice)	sam_BLB_3x_S	PRJEB3180	ERS159227	ERR161567
SAMEA2017528	Oryza sativa Japonica Group (Japanese rice)	Hwayeong	PRJEB3159	ERS157168	ERR158568
SAMEA2017592	Oryza sativa Japonica Group (Japanese rice)	HY-08	PRJEB3179	ERS159224	ERR161564
SAMN00139534	Oryza sativa Japonica Group (Japanese rice)	Nipponbare	PRJNA158009	SRS140317	SRR1614244
SAMN01121943	Oryza sativa Indica Group (long-grained rice)	IR64		SRS359200	SRR546420
SAMN01125970	Oryza sativa Indica Group (long-grained rice)	DJ123		SRS359380	SRR546695
SAMN02209968	Oryza sativa Indica Group (long-grained rice)	IR8	PRJNA208420	SRS451310	SRR921498
SAMN02209969	Oryza sativa (rice); Indica	Oryza sativa isolate:TN1	PRJNA208419	SRS452355	SRR921505
SAMN02209972	Oryza sativa (rice); tri-parental cross breeding b/w indica and japonica	Tongil	PRJNA208423	SRS453906	SRR923809
SAMN02209992	Oryza sativa Japonica Group (Japanese rice)	Yukara	PRJNA208421	SRS453905	SRR925387
SAMN02231725	Oryza sativa Indica Group (long-grained rice)	strain:93-11	PRJNA211839	SRS457028	SRR933669
SAMN02375081	Oryza rufipogon	W593	PRJNA222757	SRS493334	SRR1016473-SRR1016474
SAMN02375088	Oryza rufipogon	W630	PRJNA222757	SRS493342	SRR1016489-SRR1016491
SAMN02401119	Oryza sativa Indica Group (long-grained rice)	HR-12	PRJNA358683	SRS1223685	SRR3056468
SAMN02821223	Oryza sativa (rice); population: Tropical japonica	CarolinaGoldSelect	PRJNA205324	SRS626689	SRR1328207
SAMN02821234	Oryza sativa (rice); population: Tropical japonica	Dixiebelle	PRJNA205324	SRS626699	SRR1328218
SAMN02821236	Oryza sativa (rice); population: Tropical japonica	Hidalgo	PRJNA205324	SRS626701	SRR1328220
SAMN02821249	Oryza sativa (rice); population: Tropical japonica	Saber	PRJNA205324	SRS626714	SRR1328233
SAMN02821270	Oryza sativa (rice); population: Tropical japonica	Parao	PRJNA205324	SRS626735	SRR1328254
SAMN02869650	Oryza sativa Indica Group (long-grained rice)	IRGC50409	PRJNA253263	SRS645452	SRR1450213
SAMN02869651	Oryza sativa Indica Group (long-grained rice)	IRGC69559	PRJNA253263	SRS645453	SRR1450214
SAMN02869652	Oryza sativa Indica Group (long-grained rice)	IRGC12880	PRJNA253263	SRS645454	SRR1450215
SAMN02869654	Oryza sativa Indica Group (long-grained rice)	IRGC32441	PRJNA253263	SRS645457	SRR1450217
SAMN02869656	Oryza sativa Indica Group (long-grained rice)	IRGC9505	PRJNA253263	SRS645456	SRR1450219
SAMN02869666	Oryza sativa Japonica Group	IRGC58398	PRJNA253261	SRS645449	SRR1450197
SAMN02869667	Oryza sativa Japonica Group (Japanese rice)	IRGC58716	PRJNA253261	SRS645450	SRR1450198
SAMN02941238	Oryza punctata	IRGC105690	PRJNA13770	SRS667829	SRR1528301
SAMN02941239	Oryza barthii	IRGC105608A	PRJNA30379	SRS667831	SRR1528330
SAMN02941241	Oryza glumipatula	GEN1233_2	PRJNA48433	SRS667926	SRR1528440
SAMN02941243	Oryza nivara	IRGC100897	PRJNA48107	SRS667927	SRR1528449
SAMN03263068	Oryza glaberrima (African rice)	IRGC103486	PRJNA264480	SRS791008	SRR1712585;SRR1712645-SRR1712647;SRR1712649;SRR1712651;SRR1712653;SRR1712656
SAMN03263070	Oryza barthii	IRGC101252	PRJNA264485	SRS791110	SRR1712898-SRR1712901;SRR1712903-SRR1712907
SAMN03263071	Oryza glumipatula	IRGC88793	PRJNA264496	SRS791112	SRR1712909-SRR1712910;SRR1712953;SRR1712964-SRR1712970
SAMN03263073	Oryza meridionalis	IRGC105298	PRJNA264483	SRS791130	SRR1712971-SRR1712981
SAMN04275173	Oryza sativa Indica Group (long-grained rice)	Co39	PRJNA305604	SRS1223274	SRR3056114
SAMN04275184	Oryza sativa Indica Group (long-grained rice)	Tadukan	PRJNA305606	SRS1223684	SRR3056466
SAMN04275185	Oryza sativa Indica Group (long-grained rice)	Tetep	PRJNA305605	SRS1223696	SRR3056278
SAMN04442258	Oryza sativa Indica Group (long-grained rice)	Purple puttu	PRJNA309223	SRS1268885	SRR3133641
SAMN07426270	Oryza sativa (rice)	Suijing18	PRJNA396422; PRJNA396093	SRS2394312	SRR5880534
SAMN07767773	Oryza sativa (rice); phenotype: weedy rice	PSRR-1	PRJNA413818	SRS2588574	SRR6166428

## Sheet: Table3
BioSample			SRA
BioSample accessiona	Organism	Description	Sample accessionc	Run accessionc
BioProject Accessionb: PRJEB1254
SAMEA1877400	Astatotilapia	Lake Massoko	ERS198942	ERR266477;ERR266453;ERR266469
SAMEA1877402	Astatotilapia	Lake Massoko	ERS198965	ERR271677;ERR266508;ERR271669
SAMEA1877404	Astatotilapia	Lake Massoko	ERS198947	ERR266482;ERR266458;ERR266490
SAMEA1877407	Astatotilapia	Lake Massoko	ERS198953	ERR266488;ERR266464;ERR266496
SAMEA1877414	Buccochromis	Southeast Arm	ERS198949	ERR266484;ERR266460;ERR266492
SAMEA1877425	Astatotilapia	Lake Massoko	ERS198944	ERR266479;ERR266455;ERR266471
SAMEA1877429	Alticorpus	Southeast Arm	ERS198955	ERR271651;ERR266498;ERR271659
SAMEA1877433	Mylochromis anaphyrmus	Southeast Arm	ERS198950	ERR266485;ERR266461;ERR266493
SAMEA1877436	Astatotilapia	Lake Massoko	ERS198946	ERR266481;ERR266457;ERR266473
SAMEA1877442	Astatotilapia	Lake Massoko	ERS198948	ERR266483;ERR266459;ERR266491
SAMEA1877447	Astatotilapia	Lake Massoko	ERS198943	ERR266478;ERR266454;ERR266470
SAMEA1877459	Trematocranus placodon	Southeast Arm	ERS198954	ERR266489;ERR266465;ERR266497
SAMEA1877464	Astatotilapia	Lake Massoko	ERS198939	ERR266474;ERR266450;ERR266466
SAMEA1877472	Otopharynx brooksi	Nkhata Bay	ERS198941	ERR266476;ERR266452;ERR266468
SAMEA1877476	Nimbochromis polystigma	Dwangwa	ERS198962	ERR271658;ERR266505;ERR271666
SAMEA1877484	Lethrinops gossei	Southeast Arm	ERS198970	ERR271682;ERR266513;ERR271674
SAMEA1877494	Astatotilapia	Lake Massoko	ERS198940	ERR266475;ERR266451;ERR266467
SAMEA1877499	Lethrinops lethrinus	Mangochi	ERS198959	ERR266475;ERR266451;ERR266467
SAMEA1877503	Otopharynx	Lake Ilamba	ERS198968	ERR271680;ERR266511;ERR271672
SAMEA1877507	Astatotilapia	Lake Massoko	ERS198966	ERR271678;ERR266509;ERR271670
SAMEA1877511	Astatotilapia	Lake Massoko	ERS198945	ERR266480;ERR266456;ERR266472
SAMEA1904322	Lethrinops longimanus	Southeast Arm	ERS208885	ERR299202;ERR295128;ERR299211
SAMEA1904323	Astatotilapia calliptera	Rovuma river	ERS208878	ERR299198;ERR295124;ERR299207
SAMEA1904324	Copadichromis quadrimaculatus	Southeast Arm	ERS208886	ERR299203;ERR295129;ERR299212
SAMEA1904326	Astatotilapia calliptera	Mbaka river	ERS208881	ERR299201;ERR295127;ERR299210
SAMEA1904327	Astatotilapia calliptera	Chizumulu island	ERS208879	ERR299199;ERR295125;ERR299208
SAMEA1904328	Astatotilapia calliptera	Lake Chilwa	ERS208880	ERR299200;ERR295126;ERR299209
SAMEA1904329	Copadichromis virginalis	Southeast Arm	ERS208887	ERR299204;ERR295130;ERR299213
SAMEA1904330	Lethrinops sp. 'oliveri'	Southeast Arm	ERS208888	ERR299205;ERR295131;ERR299214
SAMEA1904331	Alticorpus geoffreyi	Southeast Arm	ERS208889	ERR299206;ERR295132;ERR299215
SAMEA1920090	Astatotilapia calliptera	Salima region	ERS208873	ERR315228;ERR303340;ERR303349;ERR303358;ERR303367;ERR303376;ERR303385;ERR303394;ERR303403
SAMEA1920092	Astatotilapia calliptera	Salima region	ERS208872	ERR315227;ERR303339;ERR303348;ERR303357;ERR303366;ERR303375;ERR303384;ERR303393;ERR303402
SAMEA1920093	Lethrinops lethrinus	Mazinzi reef	ERS208875	ERR315230;ERR303342;ERR303351;ERR303360;ERR303369;ERR303378;ERR303387;ERR303396;ERR303405
SAMEA1920094	Lethrinops lethrinus	Mazinzi reef	ERS208876	ERR315231;ERR303343;ERR303352;ERR303361;ERR303370;ERR303379;ERR303388;ERR303397;ERR303406
SAMEA1920096	Aulonocara stuartgranti	Usisya region	ERS208882	ERR315233;ERR303345;ERR303354;ERR303363;ERR303372;ERR303381;ERR303390;ERR303399;ERR303408
SAMEA1920097	Aulonocara stuartgranti	Usisya region	ERS208883	ERR315234;ERR303346;ERR303355;ERR303364;ERR303373;ERR303382;ERR303391;ERR303400;ERR303409
SAMEA2661243	Placidochromis cf. subocularis MRI-2005	Nachengwa lodge	ERS510457	ERR702304
SAMEA2661244	Placidochromis cf. subocularis MRI-2005	Nachengwa lodge	ERS510458	ERR702305
SAMEA2661245	Placidochromis cf. subocularis MRI-2005	Nachengwa lodge	ERS510459	ERR702306
SAMEA2661246	Placidochromis cf. subocularis MRI-2005	Nachengwa lodge	ERS510460	ERR702307
SAMEA2661247	Aulonocara sp. 'gold'	SE Arm	ERS510461	ERR715499
SAMEA2661248	Aulonocara	Chilumba	ERS510462	ERR715500
SAMEA2661249	Astatotilapia	Rujewa	ERS510463	ERR715501
SAMEA2661250	Chilotilapia rhoadesii	Mangochi	ERS510464	ERR702308
SAMEA2661251	Dimidiochromis compressiceps	Mangochi	ERS510465	ERR715502
SAMEA2661252	Diplotaxodon cf. macrops 'black dorsal'	Nkhata Bay	ERS510466	ERR715503
SAMEA2661253	Cynotilapia afra	Nkhata Bay	ERS510467	ERR715504
SAMEA2661255	Aulonocara sp. 'yellow'	SE Arm	ERS510469	ERR715506
SAMEA2661256	Aulonocara	SE Arm	ERS510470	ERR715507
SAMEA2661257	Cynotilapia	Nkhata Bay	ERS510471	ERR715508
SAMEA2661258	Alticorpus	SE Arm	ERS510472	ERR715509
SAMEA2661259	Cyathochromis obliquidens	Mangochi	ERS510473	ERR715510
SAMEA2661260	Diplotaxodon limnothrissa	SE Arm	ERS510474	ERR715511
SAMEA2661261	Fossorochromis rostratus	Salima	ERS510475	ERR715512
SAMEA2661262	Genyochromis mento	Chiofu	ERS510476	ERR715513
SAMEA2661263	Fossorochromis rostratus	Chiofu	ERS510477	ERR702309
SAMEA2661264	Fossorochromis rostratus	Cape Maclear	ERS510478	ERR715476
SAMEA2661265	Protomelas spilopterus	Mangochi	ERS510479	ERR715514
SAMEA2661266	Iodotropheus sprengerae	Chiofu	ERS510480	ERR715515
SAMEA2661267	Labeotropheus trewavasae	Chiofu	ERS510481	ERR715477
SAMEA2661268	Fossorochromis rostratus	Chiofu	ERS510482	ERR715516
SAMEA2661269	Diplotaxodon macrops	SE Arm	ERS510483	ERR715517
SAMEA2661270	Hemitilapia oxyrhynchus	Mangochi	ERS510484	ERR715518
SAMEA2661272	Tropheops tropheops	Cape Maclear	ERS510486	ERR715519
SAMEA2661275	Petrotilapia genalutea	Cape Maclear	ERS510489	ERR715521
SAMEA2661277	Dimidiochromis strigatus	Salima	ERS510491	ERR715523
SAMEA2661278	Placidochromis	Chia Lagoon	ERS510492	ERR715524
SAMEA2661279	Placidochromis	Chia Lagoon	ERS510493	ERR715478
SAMEA2661280	Placidochromis	Chia Lagoon	ERS510494	ERR715479
SAMEA2661281	Placidochromis	Chia Lagoon	ERS510495	ERR715480
SAMEA2661282	Placidochromis	Chia Lagoon	ERS510496	ERR715481
SAMEA2661283	Copadichromis virginalis	Lake Malombe	ERS510497	ERR715482
SAMEA2661285	Copadichromis virginalis	Lake Malombe	ERS510499	ERR715483
SAMEA2661287	Placidochromis cf. subocularis MRI-2005	Nachengwa lodge	ERS510501	ERR715484
SAMEA2661288	Placidochromis cf. subocularis MRI-2005	Nachengwa lodge	ERS510502	ERR715485
SAMEA2661289	Placidochromis cf. subocularis MRI-2005	Nachengwa lodge	ERS510503	ERR715486
SAMEA2661290	Placidochromis cf. subocularis MRI-2005	Nachengwa lodge	ERS510504	ERR715487
SAMEA2661381	Astatotilapia calliptera	Chitimba, site 79	ERS510595	ERR715530
SAMEA2661382	Astatotilapia calliptera	North Rukuru, site 80	ERS510596	ERR715531
SAMEA2661383	Astatotilapia calliptera	Songwe River, site 81	ERS510597	ERR715532
SAMEA2661384	Astatotilapia calliptera	South Rukuru, site 30	ERS510598	ERR715533
SAMEA2661385	Astatotilapia calliptera	Enukweni	ERS510599	ERR715534
SAMEA2661386	Astatotilapia calliptera	Lake Chidya, site 20	ERS510600	ERR715535
SAMEA2661387	Astatotilapia calliptera	Kitai Dam, Site 11	ERS510601	ERR715536
SAMEA2661388	Astatotilapia calliptera	Upper Rovuma, Site 12	ERS510602	ERR715537
SAMEA2661389	Astatotilapia calliptera	Near Kyela, site 2	ERS510603	ERR715538
SAMEA2661390	Astatotilapia calliptera	Luwawa	ERS510604	ERR715539
SAMEA2661391	Astatotilapia calliptera	Bua	ERS510605	ERR715540
SAMEA3388853	Rhamphochromis longiceps	Metangula	ERS724925	ERR1081365
SAMEA3388854	Stigmatochromis	Cape Maclear	ERS724926	ERR1081366
SAMEA3388855	Tyrannochromis nigriventer	Minos Reef	ERS724934	ERR1081367
SAMEA3388856	Rhamphochromis woodi	Nkhata Bay	ERS724935	ERR1081368
SAMEA3388857	Taeniochromis holotaenia	Metangula	ERS724936	ERR1081369
SAMEA3388858	Taeniolethrinops	Chiwanga	ERS724937	ERR1081370
SAMEA3388859	Dimidiochromis kiwinge	Metangula	ERS724938	ERR1081371
SAMEA3388860	Taeniolethrinops praeorbitalis	Mangochi	ERS724939	ERR1081373
SAMEA3388862	Mylochromis ericotaenia	Cape Maclear	ERS724941	ERR1081374
SAMEA3388863	Stigmatochromis modestus	Cape Maclear	ERS724942	ERR1081375
SAMEA3388864	Hemitilapia oxyrhynchus	Mangochi	ERS724943	ERR1081376
SAMEA3388867	Haplochromis tweddlei	Lake Chiuta	ERS724946	ERR1081378
SAMEA3388868	Taeniolethrinops furcicauda	Metangula	ERS724954	ERR1081379
SAMEA3388870	Dimidiochromis strigatus	Mangochi	ERS724956	ERR1081380
SAMEA3388871	Pallidochromis tokolosh	SE Arm	ERS724957	ERR1081381
SAMEA3388872	Otopharynx lithobates	Cape Maclear	ERS724958	ERR1081382
SAMEA3388873	Rhamphochromis esox	Tukombo	ERS724959	ERR1081383
SAMEA3388874	Maylandia zebra	Matema	ERS724960	ERR1081384
SAMEA3388875	Astatotilapia calliptera	Itupi	ERS724961	ERR1081385
SAMEA3388876	Astatotilapia calliptera	Lower Itupi	ERS724962	ERR1081386
SAMEA3388877	Astatotilapia calliptera	Lower Itupi	ERS724963	ERR1081387
SAMEA3388878	Astatotilapia calliptera	Upper Itupi	ERS724964	ERR1081388
SAMEA3480882	Protomelas spilopterus	Liwonde	ERS788663	ERR1081372
BioProject accessionb: PRJEB15289
SAMEA6147764	Astatotilapia sp. 'Blue Rufiji' ('Astatotilapia rufiji blue')		ERS3947805	ERR3634115
SAMEA6147765	Astatotilapia sp. 'rukwa large yellow' ('Astatotilapia rukwa large yellow')		ERS3947806	ERR3634109
SAMEA6147767	Astatotilapia sp. 'rukwa sunset' ('Astatotilapia rukwa sunset')		ERS3947808	ERR3634108
SAMEA6147768	Astatotilapia sp. 'rukwa blue' ('Astatotilapia rukwa blue')		ERS3947809	ERR3634107
SAMEA6147769	Astatotilapia sp. 'Ruaha' ('Astatotilapia ruaha blue')		ERS3947810	ERR3634110
SAMEA6147770	Astatotilapia sp. 'Blue Rufiji' ('Astatotilapia rufiji blue')		ERS3947811	ERR3634114
SAMEA6147771	Astatotilapia sp. 'longfin yellow' ('Astatotilapia ruaha yellow')		ERS3947812	ERR3634112
SAMEA6147772	Astatotilapia sp. 'ruaha red cheek' ('Astatotilapia ruaha yellow')		ERS3947813	ERR3634113

## Sheet: Table4
BioSample accession (Sample ID)*	Sample name*	Group (rice type)	Group abbreviation (rice type)*	Cultivar names/aliases
SAMD00003725	O_sat_ind_Takanari	Oryza sativa Indica Group	IND	Takanari
SAMD00003726	O_sat_tej_Tachiaoba	Oryza sativa Japonica Group (temperate japonica)	TEJ	Tachiaoba
SAMD00003727	O_sat_jp/ind_Mizuhochikara	Japonica/Indica hybrid	JP_IND	Mizuhochikara
SAMD00003728	O_sat_jp/ind_Suweon258	Japonica/Indica hybrid	JP_IND	Suweon258
SAMD00003729	O_sat_ind_Tachisugata	Oryza sativa Indica Group	IND	Tachisugata
SAMD00003730	O_sat_ind_Hokuriku193	Oryza sativa Indica Group	IND	Hokuriku193
SAMD00004056	O_sat_aus_Kasalath_SAMD00004056	Oryza sativa (aus group)	AUS	Kasalath
SAMD00004172	O_rufipogon_W0630	Oryza rufipogon	RUF	W0630
SAMD00009825	O_sat_tej_OMACHI	Oryza sativa Japonica Group (temperate japonica)	TEJ	OMACHI
SAMD00010631	O_sat_trj_Moroberekan	Oryza sativa Japonica Group (tropical japonica)	TRJ	Moroberekan
SAMD00010632	O_sat_tej_Koshihikari_SAMD00010632	Oryza sativa Japonica Group (temperate japonica)	TEJ	Koshihikari
SAMD00010633	O_sat_tej_Yamadanishiki	Oryza sativa Japonica Group (temperate japonica)	TEJ	Yamadanishiki
SAMD00010634	O_sat_tej_Norin8	Oryza sativa Japonica Group (temperate japonica)	TEJ	Norin8
SAMD00010635	O_sat_tej_Gohyakumangoku	Oryza sativa Japonica Group (temperate japonica)	TEJ	Gohyakumangoku
SAMD00010636	O_sat_tej_Kameji	Oryza sativa Japonica Group (temperate japonica)	TEJ	Kameji
SAMD00013510	O_sat_tej_Hitomebore_SAMD00013510	Oryza sativa Japonica Group (temperate japonica)	TEJ	Hitomebore
SAMD00016906	O_sat_tej_Kitaake	Oryza sativa Japonica Group (temperate japonica)	TEJ	Kitaake
SAMD00045947	O_sat_tej_Koshihikari_SAMD00045947	Oryza sativa Japonica Group (temperate japonica)	TEJ	Koshihikari
SAMD00045965	O_sat_tej_Nipponbare_SAMD00045965	Oryza sativa Japonica Group (temperate japonica)	TEJ	Nipponbare
SAMD00077979	O_sat_tej_Koshihikari_SAMD00077979	Oryza sativa Japonica Group (temperate japonica)	TEJ	Koshihikari
SAMD00077980	O_sat_tej_Hoshinoyume	Oryza sativa Japonica Group (temperate japonica)	TEJ	Hoshinoyume
SAMD00077981	O_sat_tej_Hitomebore_SAMD00077981	Oryza sativa Japonica Group (temperate japonica)	TEJ	Hitomebore
SAMD00077982	O_sat_tej_Tentakaku	Oryza sativa Japonica Group (temperate japonica)	TEJ	Tentakaku
SAMD00077983	O_sat_tej_Tenkomori	Oryza sativa Japonica Group (temperate japonica)	TEJ	Tenkomori
SAMD00077984	O_sat_tej_Hinohikari	Oryza sativa Japonica Group (temperate japonica)	TEJ	Hinohikari
SAMD00077985	O_sat_tej_Genkitsukushi	Oryza sativa Japonica Group (temperate japonica)	TEJ	Genkitsukushi
SAMD00077986	O_sat_tej_Koshihikari-SBL1	Oryza sativa Japonica Group (temperate japonica)	TEJ	Koshihikari-SBL1
SAMD00077987	O_sat_tej_Nipponbare_SAMD00077987	Oryza sativa Japonica Group (temperate japonica)	TEJ	Nipponbare
SAMD00077988	O_sat_aus_Kasalath_SAMD00077988	Oryza sativa (aus group)	AUS	Kasalath
SAMD00078852	O_sat_ind_Tupa_121-3	Oryza sativa Indica Group	IND	Tupa 121-3
SAMD00078853	O_sat_ind_Bei_Khe	Oryza sativa Indica Group	IND	Bei Khe
SAMD00078854	O_sat_ind_Nona_Bokra	Oryza sativa Indica Group	IND	Nona Bokra
SAMD00078855	O_sat_trj_LAC_23	Oryza sativa Japonica Group (tropical japonica)	TRJ	LAC 23
SAMD00078856	O_sat_trj_Khau_Mac_Kho	Oryza sativa Japonica Group (tropical japonica)	TRJ	Khau Mac Kho
SAMD00078857	O_sat_trj_Khao_Nam_Jen	Oryza sativa Japonica Group (tropical japonica)	TRJ	Khao Nam Jen
SAMD00078858	O_sat_tej_Hayamasari	Oryza sativa Japonica Group (temperate japonica)	TEJ	Hayamasari
SAMD00080139	O_sat_tej_Akidawara	Oryza sativa Japonica Group (temperate japonica)	TEJ	Akidawara
SAMD00080141	O_sat_ind_Ruriaoba	Oryza sativa Indica Group	IND	Ruriaoba
SAMD00116538	O_sat_trj/gla_NERICA_3	Oryza glaberrima x Oryza sativa	TRJ_GLA	NERICA 3
SAMD00116539	O_sat_trj/gla_NERICA_4	Oryza glaberrima x Oryza sativa	TRJ_GLA	NERICA 4
SAMD00116540	O_sat_trj/gla_NERICA_5	Oryza glaberrima x Oryza sativa	TRJ_GLA	NERICA 5
SAMD00116541	O_sat_trj/gla_NERICA_7	Oryza glaberrima x Oryza sativa	TRJ_GLA	NERICA 7
SAMD00116542	O_sat_trj_WAB_56-104	Oryza sativa Japonica Group (tropical japonica)	TRJ	WAB 56-104
SAMD00116543	O_glaberrima_CG_14	Oryza glaberrima	GLA	CG 14
SAMEA104459802	O_rufipogon_W0123-1	Oryza rufipogon	RUF	W0123-1
SAMEA104459803	O_sat_aus_W3105-1	Oryza sativa (aus group)	AUS	W3105-1
SAMEA104459804	O_rufipogon_W3095-2	Oryza rufipogon	RUF	W3095-2
SAMEA104459805	O_rufipogon_W3078-2	Oryza rufipogon	RUF	W3078-2
SAMEA104459806	O_sat_tej_Kongyu_131	Oryza sativa Japonica Group (temperate japonica)	TEJ	KY131; Kongyu 131
SAMEA104459807	O_sat_tej_Wuyungeng_7	Oryza sativa Japonica Group (temperate japonica)	TEJ	WYG7; Wuyungeng 7
SAMEA104460747	O_sat_tej_Honghandao	Oryza sativa Japonica Group (temperate japonica)	TEJ	UR28; Honghandao
SAMEA104460749	O_sat_tej_Longgeng_31	Oryza sativa Japonica Group (temperate japonica)	TEJ	LG31; Longgeng 31
SAMEA104460751	O_sat_tej_Koshihikari_SAMEA104460751	Oryza sativa Japonica Group (temperate japonica)	TEJ	Koshihikari
SAMEA104460752	O_sat_aus_Kasalath_SAMEA104460752	Oryza sativa (aus group)	AUS	Kasalath
SAMEA104460753	O_sat_tej_Tohoku_IL9	Oryza sativa Japonica Group (temperate japonica)	TEJ	IL9; Tohoku IL9
SAMEA104460759	O_sat_ind_Dishuigu	Oryza sativa Indica Group	IND	HP517-1; HP517; Dishuigu
SAMEA104467886	O_sat_tej_Daohuaxiang2	Oryza sativa Japonica Group (temperate japonica)	TEJ	DHX2; Daohuaxiang 2
SAMEA104467887	O_sat_ind_Guangluai-4	Oryza sativa Indica Group	IND	Gla4; Guangluai-4
SAMEA104467888	O_sat_aro_Basmati_Surkh_89-15	Oryza sativa (aromatic group)	ARO	GP295-1; Basmati Surkh 89-15
SAMEA104467889	O_sat_trj_Mutiara	Oryza sativa Japonica Group (tropical japonica)	TRJ	GP761-1; Mutiara
SAMEA104467890	O_sat_ind_Xiangnan-1	Oryza sativa Indica Group	IND	GP772-1; Xiangnan-1
SAMEA104467891	O_sat_tej_Fengrunhandaozi	Oryza sativa Japonica Group (temperate japonica)	TEJ	HP13-2; HP13; Fengrunhandaozi
SAMEA104467892	O_sat_ind_Bangbanggu	Oryza sativa Indica Group	IND	HP362-2; HP362; Bangbanggu
SAMEA104469216	O_sat_aus_DNJ_126	Oryza sativa (aus group)	AUS	GP124; DNJ 126
SAMEA104469217	O_sat_ind_IR_2797-115-3	Oryza sativa Indica Group	IND	GP22; IR 2797-115-3
SAMEA104469219	O_sat_trj_IAC_25	Oryza sativa Japonica Group (tropical japonica)	TRJ	GP39; IAC 25
SAMEA104469220	O_sat_ind_T_480-34	Oryza sativa Indica Group	IND	GP51; T 480-34
SAMEA104469221	O_sat_trj_Minanok_glut	Oryza sativa Japonica Group (tropical japonica)	TRJ	GP536; Minanok (glut)
SAMEA104469222	O_sat_aus_Kbarai_Ganja	Oryza sativa (aus group)	AUS	GP540; Kbarai Ganja
SAMEA104469223	O_sat_tej_Nonglinnuo-144	Oryza sativa Japonica Group (temperate japonica)	TEJ	GP551; Nonglinnuo-144
SAMEA104469224	O_sat_tej_Pama	Oryza sativa Japonica Group (temperate japonica)	TEJ	GP567; Pama
SAMEA104469226	O_sat_trj_Tebonnet	Oryza sativa Japonica Group (tropical japonica)	TRJ	GP640; Tebonnet
SAMEA104469227	O_sat_tej_Teng-870	Oryza sativa Japonica Group (temperate japonica)	TEJ	GP669; Teng-870
SAMEA104469228	O_sat_tej_Milyang84	Oryza sativa Japonica Group (temperate japonica)	TEJ	GP677; MILYANG84
SAMEA104469229	O_sat_ind_IR_9209-26-2	Oryza sativa Indica Group	IND	GP72; IR 9209-26-2
SAMEA104469231	O_sat_tej_Binxianludao	Oryza sativa Japonica Group (temperate japonica)	TEJ	HP103; Binxianludao
SAMEA104469232	O_sat_ind_Huakemangnuo	Oryza sativa Indica Group	IND	HP119; Huakemangnuo
SAMEA104469233	O_sat_tej_Qiananshuinuo	Oryza sativa Japonica Group (temperate japonica)	TEJ	HP14; Qiananshuinuo
SAMEA104469237	O_sat_ind_Maguhongmi	Oryza sativa Indica Group	IND	HP327; Maguhongmi
SAMEA104469238	O_sat_tej_Dabainuo	Oryza sativa Japonica Group (temperate japonica)	TEJ	rHP38; Dabainuo
SAMEA104469239	O_sat_ind_Guihuanuo	Oryza sativa Indica Group	IND	HP383; Guihuanuo
SAMEA104469240	O_sat_tej_Dongying-8	Oryza sativa Japonica Group (temperate japonica)	TEJ	HP390; Dongying-8
SAMEA104469241	O_sat_ind_Sizhan	Oryza sativa Indica Group	IND	HP396; Sizhan
SAMEA104469242	O_sat_ind_Aigansazhima	Oryza sativa Indica Group	IND	HP407; Aigansazhima
SAMEA104469243	O_sat_tej_Honggu-1	Oryza sativa Japonica Group (temperate japonica)	TEJ	HP44; Honggu-1
SAMEA104469244	O_sat_tej_Changlijingzhan	Oryza sativa Japonica Group (temperate japonica)	TEJ	rice HP45; Changlijingzhan
SAMEA104469246	O_sat_ind_Jinzhan	Oryza sativa Indica Group	IND	HP486; Jinzhan
SAMEA104469247	O_sat_ind_Shuihegu	Oryza sativa Indica Group	IND	HP492; Shuihegu
SAMEA104469248	O_sat_ind_Yanzhan	Oryza sativa Indica Group	IND	HP577; Yanzhan
SAMEA104469250	O_sat_tej_Nipponbare_SAMEA104469250	Oryza sativa Japonica Group (temperate japonica)	TEJ	Nipponbare
SAMEA104469251	O_sat_ind_W0128	Oryza sativa Indica Group	IND	W0128
SAMEA104469252	O_rufipogon_W0141	Oryza rufipogon	RUF	W0141
SAMEA104469253	O_rufipogon_W0170	Oryza rufipogon	RUF	common wild rice W0170
SAMEA104469254	O_rufipogon_W1687	Oryza rufipogon	RUF	common wild rice W1687
SAMEA104469255	O_rufipogon_W1698	Oryza rufipogon	RUF	common wild rice W1698
SAMEA104469256	O_rufipogon_W1739	Oryza rufipogon	RUF	common wild rice W1739
SAMEA104469257	O_rufipogon_W1754	Oryza rufipogon	RUF	common wild rice W1754
SAMEA104469258	O_rufipogon_W1777	Oryza rufipogon	RUF	common wild rice W1777
SAMEA104469259	O_rufipogon_W1943	Oryza rufipogon	RUF	common wild rice W1943
SAMEA104469260	O_rufipogon_W1979	Oryza rufipogon	RUF	common wild rice W1979
SAMEA104469261	O_rufipogon_W2012	Oryza rufipogon	RUF	common wild rice W2012
SAMEA2015633	O_sat_jp_Dongjin	Oryza sativa Japonica Group	JP	Dongjin
SAMEA2016954	O_sat_jp_HY-04	Oryza sativa Japonica Group	JP	HY-04
SAMEA2017052	O_sat_jp_BLB	Oryza sativa Japonica Group	JP	sam_BLB_3x_S
SAMEA2017528	O_sat_jp_Hwayeong	Oryza sativa Japonica Group	JP	Hwayeong
SAMEA2017592	O_sat_jp_HY-08	Oryza sativa Japonica Group	JP	HY-08
SAMN00139534	O_sat_tej_Nipponbare_SAMN00139534	Oryza sativa Japonica Group (temperate japonica)	TEJ	Nipponbare
SAMN01121943	O_sat_ind_ IR64	Oryza sativa Indica Group	IND	IR64
SAMN01125970	O_sat_aus_DJ123	Oryza sativa (aus group)	AUS	DJ123
SAMN02209968	O_sat_ind_IR8	Oryza sativa Indica Group	IND	IR8
SAMN02209969	O_sat_ind_Taichung_Native_1	Oryza sativa Indica Group	IND	Taichung Native 1; TN1
SAMN02209972	O_sat_jp/ind_Tongil	Japonica/Indica hybrid	JP_IND	Tongil
SAMN02209992	O_sat_jp_Yukara	Oryza sativa Japonica Group	JP	Yukara
SAMN02231725	O_sat_ind_BGI_93-11	Oryza sativa Indica Group	IND	93-11; BGI_93-11
SAMN02375081	O_rufipogon_W593	Oryza rufipogon	RUF	W593
SAMN02375088	O_rufipogon_W630	Oryza rufipogon	RUF	W630
SAMN02401119	O_sat_ind_HR-12	Oryza sativa Indica Group	IND	HR-12
SAMN02821223	O_sat_trj_CarolinaGoldSelect	Oryza sativa Japonica Group (tropical japonica)	TRJ	CarolinaGoldSelect
SAMN02821234	O_sat_trj_Dixiebelle	Oryza sativa Japonica Group (tropical japonica)	TRJ	Dixiebelle
SAMN02821236	O_sat_trj_Hidalgo	Oryza sativa Japonica Group (tropical japonica)	TRJ	Hidalgo
SAMN02821249	O_sat_trj_Saber	Oryza sativa Japonica Group (tropical japonica)	TRJ	Saber
SAMN02821270	O_sat_trj_Parao	Oryza sativa Japonica Group (tropical japonica)	TRJ	Parao
SAMN02869650	O_sat_ind_IRGC50409	Oryza sativa Indica Group	IND	IRGC50409
SAMN02869651	O_sat_ind_IRGC69559	Oryza sativa Indica Group	IND	IRGC69559
SAMN02869652	O_sat_ind_Dom_Sufid	Oryza sativa Indica Group	IND	IRGC12880; Dom Sufid
SAMN02869654	O_sat_ind_GURULEY	Oryza sativa Indica Group	IND	IRGC32441; GURULEY
SAMN02869656	O_sat_ind_IRGC9505	Oryza sativa Indica Group	IND	IRGC9505
SAMN02869666	O_sat_jp_IRGC58398	Oryza sativa Japonica Group	JP	IRGC58398
SAMN02869667	O_sat_jp_IRGC58716	Oryza sativa Japonica Group	JP	IRGC58716
SAMN02941238	O_pun_IRGC105690	Oryza punctata	PUN	IRGC105690
SAMN02941239	O_barthii_IRGC105608A	Oryza barthii	BAR	IRGC105608A
SAMN02941241	O_glumipatula_GEN1233_2	Oryza glumipatula	GLU	GEN1233_2
SAMN02941243	O_nivara_IRGC100897	Oryza nivara	NIV	IRGC100897
SAMN03263068	O_glaberrima_IRGC103486	Oryza glaberrima	GLA	IRGC103486
SAMN03263070	O_barthi_IRGC101252	Oryza barthii	BAR	IRGC101252
SAMN03263071	O_glumipatula_IRGC88793	Oryza glumipatula	GLU	IRGC88793
SAMN03263073	O_meridionalis_IRGC105298	Oryza meridionalis	MER	IRGC105298
SAMN04275173	O_sat_ind_Co39	Oryza sativa Indica Group	IND	Co39
SAMN04275184	O_sat_ind_Tadukan	Oryza sativa Indica Group	IND	Tadukan
SAMN04275185	O_sat_ind_Tetep	Oryza sativa Indica Group	IND	Tetep
SAMN04442258	O_sat_ind_Purple_puttu	Oryza sativa Indica Group	IND	Purple puttu
SAMN07426270	O_sat_jp_Suijing18	Oryza sativa Japonica Group	JP	Suijing18
SAMN07767773	O_sat_weedy_PSRR-1	Oryza sativa (weedy rice)	Weedy	PSRR-1

## Sheet: Table5
BioSample accession (Sample ID)*	Sample name*	Organism	Eco-morphological group*	Geographic location of the sampling site	Group abbreviation (sampling location)*
SAMEA1877400	Astatotilapia_yellow_Massoko_Lake_SAMEA1877400	Astatotilapia calliptera	Astatotilapia_calliptera	Mbeya Region (southwestern Tanzania)	TZA_SW_Mbeya
SAMEA1877402	Astatotilapia_yellow_Massoko_Lake_SAMEA1877402	Astatotilapia calliptera	Astatotilapia_calliptera	Mbeya Region (southwestern Tanzania)	TZA_SW_Mbeya
SAMEA1877404	Astatotilapia_blue_Massoko_Lake_SAMEA1877404	Astatotilapia calliptera	Astatotilapia_calliptera	Mbeya Region (southwestern Tanzania)	TZA_SW_Mbeya
SAMEA1877407	Astatotilapia_yellow_Massoko_Lake_SAMEA1877407	Astatotilapia calliptera	Astatotilapia_calliptera	Mbeya Region (southwestern Tanzania)	TZA_SW_Mbeya
SAMEA1877414	Buccochromis_rhoadesii_Southeast_Arm	Buccochromis rhoadesii	shallow_benthic	Mangochi (Southern Region, Malawi)	MWI_SRN_Reg_Mangochi
SAMEA1877425	Astatotilapia_blue_Massoko_Lake_SAMEA1877425	Astatotilapia calliptera	Astatotilapia_calliptera	Mbeya Region (southwestern Tanzania)	TZA_SW_Mbeya
SAMEA1877429	Alticorpus_macrocleithrum_Southeast_Arm	Alticorpus macrocleithrum	deep_benthic	Mangochi (Southern Region, Malawi)	MWI_SRN_Reg_Mangochi
SAMEA1877433	Mylochromis_anaphyrmus_Southeast_Arm	Mylochromis anaphyrmus	shallow_benthic	Mangochi (Southern Region, Malawi)	MWI_SRN_Reg_Mangochi
SAMEA1877436	Astatotilapia_blue_Massoko_Lake_SAMEA1877436	Astatotilapia calliptera	Astatotilapia_calliptera	Mbeya Region (southwestern Tanzania)	TZA_SW_Mbeya
SAMEA1877442	Astatotilapia_yellow_Massoko_Lake_SAMEA1877442	Astatotilapia calliptera	Astatotilapia_calliptera	Mbeya Region (southwestern Tanzania)	TZA_SW_Mbeya
SAMEA1877447	Astatotilapia_yellow_Massoko_Lake_SAMEA1877447	Astatotilapia calliptera	Astatotilapia_calliptera	Mbeya Region (southwestern Tanzania)	TZA_SW_Mbeya
SAMEA1877459	Trematocranus_placodon_Southeast_Arm	Trematocranus placodon	shallow_benthic	Mangochi (Southern Region, Malawi)	MWI_SRN_Reg_Mangochi
SAMEA1877464	Astatotilapia_blue_Massoko_Lake_SAMEA1877464	Astatotilapia calliptera	Astatotilapia_calliptera	Mbeya Region (southwestern Tanzania)	TZA_SW_Mbeya
SAMEA1877472	Otopharynx_brooksi_Nkhata_Bay	Otopharynx brooksi	shallow_benthic	Nkhata Bay (Northern Region, Malawi)	MWI_NRN_Reg_Nkhata_Bay
SAMEA1877476	Nimbochromis_polystigma_Dwangwa_River	Nimbochromis polystigma	shallow_benthic	Nkhotakota (Central Region, Malawi)	MWI_CNTRL_Reg_Nkhotakota
SAMEA1877484	Lethrinops_gossei_Southeast_Arm	Lethrinops gossei	deep_benthic	Mangochi (Southern Region, Malawi)	MWI_SRN_Reg_Mangochi
SAMEA1877494	Astatotilapia_blue_Massoko_Lake_SAMEA1877494	Astatotilapia calliptera	Astatotilapia_calliptera	Mbeya Region (southwestern Tanzania)	TZA_SW_Mbeya
SAMEA1877499	Lethrinops_lethrinus_Mangochi	Lethrinops lethrinus	shallow_benthic	Mangochi (Southern Region, Malawi)	MWI_SRN_Reg_Mangochi
SAMEA1877503	Otopharynx_tetrastigma_Ilamba_Lake	Otopharynx tetrastigma	shallow_benthic	Mbeya Region (southwestern Tanzania)	TZA_SW_Mbeya
SAMEA1877507	Astatotilapia_yellow_Massoko_Lake_SAMEA1877507	Astatotilapia calliptera	Astatotilapia_calliptera	Mbeya Region (southwestern Tanzania)	TZA_SW_Mbeya
SAMEA1877511	Astatotilapia_blue_Massoko_Lake_SAMEA1877511	Astatotilapia calliptera	Astatotilapia_calliptera	Mbeya Region (southwestern Tanzania)	TZA_SW_Mbeya
SAMEA1904322	Lethrinops_longimanus_Southeast_Arm	Lethrinops longimanus	deep_benthic	Mangochi (Southern Region, Malawi)	MWI_SRN_Reg_Mangochi
SAMEA1904323	Astatotilapia_calliptera_Rovuma_River	Astatotilapia calliptera	Astatotilapia_calliptera	Ruvuma River (southeastern Tanzania)	TZA_SW_Ruvuma_Riv
SAMEA1904324	Copadichromis_quadrimaculatus_Southeast_Arm	Copadichromis quadrimaculatus	utaka	Mangochi (Southern Region, Malawi)	MWI_SRN_Reg_Mangochi
SAMEA1904326	Astatotilapia_calliptera_Mbaka_River	Astatotilapia calliptera	Astatotilapia_calliptera	Mbeya Region (southwestern Tanzania)	TZA_SW_Mbeya
SAMEA1904327	Astatotilapia_calliptera_Chizumulu_Island	Astatotilapia calliptera	Astatotilapia_calliptera	Likoma (Northern Region, Malawi)	MWI_NRN_Reg_Likoma
SAMEA1904328	Astatotilapia_calliptera_Chilwa_Lake	Astatotilapia calliptera	Astatotilapia_calliptera	Zomba (Southern Region, Malawi)	MWI_SRN_Reg_Zomba
SAMEA1904329	Copadichromis_virginalis_Southeast_Arm	Copadichromis virginalis	utaka	Mangochi (Southern Region, Malawi)	MWI_SRN_Reg_Mangochi
SAMEA1904330	Lethrinops_oliveri_Southeast_Arm	Lethrinops sp. 'oliveri'	deep_benthic	Mangochi (Southern Region, Malawi)	MWI_SRN_Reg_Mangochi
SAMEA1904331	Alticorpus_geoffreyi_Southeast_Arm	Alticorpus geoffreyi	deep_benthic	Mangochi (Southern Region, Malawi)	MWI_SRN_Reg_Mangochi
SAMEA1920090	Astatotilapia_calliptera_Salima_SAMEA1920090	Astatotilapia calliptera	Astatotilapia_calliptera	Salima (Central Region, Malawi)	MWI_CNTRL_Reg_Salima
SAMEA1920092	Astatotilapia_calliptera_Salima_SAMEA1920092	Astatotilapia calliptera	Astatotilapia_calliptera	Salima (Central Region, Malawi)	MWI_CNTRL_Reg_Salima
SAMEA1920093	Lethrinops_lethrinus_Mazinzi_Reef_SAMEA1920093	Lethrinops lethrinus	shallow_benthic	Mangochi (Southern Region, Malawi)	MWI_SRN_Reg_Mangochi
SAMEA1920094	Lethrinops_lethrinus_Mazinzi_Reef_SAMEA1920094	Lethrinops lethrinus	shallow_benthic	Mangochi (Southern Region, Malawi)	MWI_SRN_Reg_Mangochi
SAMEA1920096	Aulonocara_stuartgranti_Usisya_SAMEA1920096	Aulonocara stuartgranti	deep_benthic	Nkhata Bay (Northern Region, Malawi)	MWI_NRN_Reg_Nkhata_Bay
SAMEA1920097	Aulonocara_stuartgranti_Usisya_SAMEA1920097	Aulonocara stuartgranti	deep_benthic	Nkhata Bay (Northern Region, Malawi)	MWI_NRN_Reg_Nkhata_Bay
SAMEA2661243	Placidochromis_subocularis_Nanchengwa_Lodge_SAMEA2661243	Placidochromis subocularis	shallow_benthic	Mangochi (Southern Region, Malawi)	MWI_SRN_Reg_Mangochi
SAMEA2661244	Placidochromis_subocularis_Nanchengwa_Lodge_SAMEA2661244	Placidochromis subocularis	shallow_benthic	Mangochi (Southern Region, Malawi)	MWI_SRN_Reg_Mangochi
SAMEA2661245	Placidochromis_subocularis_Nanchengwa_Lodge_SAMEA2661245	Placidochromis subocularis	shallow_benthic	Mangochi (Southern Region, Malawi)	MWI_SRN_Reg_Mangochi
SAMEA2661246	Placidochromis_subocularis_Nanchengwa_Lodge_SAMEA2661246	Placidochromis subocularis	shallow_benthic	Mangochi (Southern Region, Malawi)	MWI_SRN_Reg_Mangochi
SAMEA2661247	Aulonocara_gold_Southeast_Arm	Aulonocara sp. 'gold'	deep_benthic	Mangochi (Southern Region, Malawi)	MWI_SRN_Reg_Mangochi
SAMEA2661248	Aulonocara_blue_Chilumba	Aulonocara sp. 'blue'	deep_benthic	Karonga (Northern Region, Malawi)	MWI_NRN_Reg_Karonga
SAMEA2661249	Astatotilapia_Rujewa	Astatotilapia	Astatotilapia_outgroup	Mbeya Region (southwestern Tanzania)	TZA_SW_Mbeya
SAMEA2661250	Chilotilapia_rhoadesii_Mangochi	Chilotilapia rhoadesii	shallow_benthic	Mangochi (Southern Region, Malawi)	MWI_SRN_Reg_Mangochi
SAMEA2661251	Dimidiochromis_compressiceps_Mangochi	Dimidiochromis compressiceps	shallow_benthic	Mangochi (Southern Region, Malawi)	MWI_SRN_Reg_Mangochi
SAMEA2661252	Diplotaxodon_macrops_black_dorsal_Nkhata_Bay	Diplotaxodon macrops	Diplotaxodon	Nkhata Bay (Northern Region, Malawi)	MWI_NRN_Reg_Nkhata_Bay
SAMEA2661253	Cynotilapia_afra_Nkhata_Bay	Cynotilapia afra	mbuna	Nkhata Bay (Northern Region, Malawi)	MWI_NRN_Reg_Nkhata_Bay
SAMEA2661255	Aulonocara_yellow_Southeast_Arm	Aulonocara sp. 'yellow'	deep_benthic	Mangochi (Southern Region, Malawi)	MWI_SRN_Reg_Mangochi
SAMEA2661256	Aulonocara_minutus_Southeast_Arm	Aulonocara sp. 'minutus'	deep_benthic	Mangochi (Southern Region, Malawi)	MWI_SRN_Reg_Mangochi
SAMEA2661257	Cynotilapia_axelrodi_Nkhata_Bay	Cynotilapia axelrodi	mbuna	Nkhata Bay (Northern Region, Malawi)	MWI_NRN_Reg_Nkhata_Bay
SAMEA2661258	Alticorpus_peterdaviesi_Southeast_Arm	Alticorpus peterdaviesi	deep_benthic	Mangochi (Southern Region, Malawi)	MWI_SRN_Reg_Mangochi
SAMEA2661259	Cyathochromis_obliquidens_Mangochi	Cyathochromis obliquidens	shallow_benthic	Mangochi (Southern Region, Malawi)	MWI_SRN_Reg_Mangochi
SAMEA2661260	Diplotaxodon_limnothrissa_Southeast_Arm	Diplotaxodon limnothrissa	Diplotaxodon	Mangochi (Southern Region, Malawi)	MWI_SRN_Reg_Mangochi
SAMEA2661261	Fossorochromis_rostratus_Salima	Fossorochromis rostratus	shallow_benthic	6; Salima (Central Region, Malawi)	MWI_CNTRL_Reg_Salima
SAMEA2661262	Genyochromis_mento_Chiofu_Bay	Genyochromis mento	mbuna	Mangochi (Southern Region, Malawi)	MWI_SRN_Reg_Mangochi
SAMEA2661263	Fossorochromis_rostratus_Chiofu_Bay_SAMEA2661263	Fossorochromis rostratus	shallow_benthic	Mangochi (Southern Region, Malawi)	MWI_SRN_Reg_Mangochi
SAMEA2661264	Fossorochromis_rostratus_Cape_Maclear	Fossorochromis rostratus	shallow_benthic	Mangochi (Southern Region, Malawi)	MWI_SRN_Reg_Mangochi
SAMEA2661265	Hemitaeniochromis_spilopterus_Mangochi	Protomelas spilopterus	shallow_benthic	Mangochi (Southern Region, Malawi)	MWI_SRN_Reg_Mangochi
SAMEA2661266	Iodotropheus_sprengerae_Chiofu_Bay	Iodotropheus sprengerae	mbuna	Mangochi (Southern Region, Malawi)	MWI_SRN_Reg_Mangochi
SAMEA2661267	Labeotropheus_trewavasae_Chiofu_Bay	Labeotropheus trewavasae	mbuna	Mangochi (Southern Region, Malawi)	MWI_SRN_Reg_Mangochi
SAMEA2661268	Fossorochromis_rostratus_Chiofu_Bay_SAMEA2661268	Fossorochromis rostratus	shallow_benthic	Mangochi (Southern Region, Malawi)	MWI_SRN_Reg_Mangochi
SAMEA2661269	Diplotaxodon_macrops_Southeast_Arm	Diplotaxodon macrops	Diplotaxodon	Mangochi (Southern Region, Malawi)	MWI_SRN_Reg_Mangochi
SAMEA2661270	Hemitilapia_oxyrhynchus_Mangochi_SAMEA2661270	Hemitilapia oxyrhyncha	shallow_benthic	Mangochi (Southern Region, Malawi)	MWI_SRN_Reg_Mangochi
SAMEA2661272	Tropheops_tropheops_Cape_Maclear	Tropheops tropheops	mbuna	Mangochi (Southern Region, Malawi)	MWI_SRN_Reg_Mangochi
SAMEA2661275	Petrotilapia_genalutea_Cape_Maclear	Petrotilapia genalutea	mbuna	Mangochi (Southern Region, Malawi)	MWI_SRN_Reg_Mangochi
SAMEA2661277	Dimidiochromis_strigatus_Salima	Dimidiochromis strigatus	shallow_benthic	Salima (Central Region, Malawi)	MWI_CNTRL_Reg_Salima
SAMEA2661278	Placidochromis_longimanus_Chia_Lagoon_SAMEA2661278	Placidochromis longimanus	shallow_benthic	Nkhotakota (Central Region, Malawi)	MWI_CNTRL_Reg_Nkhotakota
SAMEA2661279	Placidochromis_longimanus_Chia_Lagoon_SAMEA2661279	Placidochromis longimanus	shallow_benthic	Nkhotakota (Central Region, Malawi)	MWI_CNTRL_Reg_Nkhotakota
SAMEA2661280	Placidochromis_longimanus_Chia_Lagoon_SAMEA2661280	Placidochromis longimanus	shallow_benthic	Nkhotakota (Central Region, Malawi)	MWI_CNTRL_Reg_Nkhotakota
SAMEA2661281	Placidochromis_longimanus_Chia_Lagoon_SAMEA2661281	Placidochromis longimanus	shallow_benthic	Nkhotakota (Central Region, Malawi)	MWI_CNTRL_Reg_Nkhotakota
SAMEA2661282	Placidochromis_longimanus_Chia_Lagoon_SAMEA2661282	Placidochromis longimanus	shallow_benthic	Nkhotakota (Central Region, Malawi)	MWI_CNTRL_Reg_Nkhotakota
SAMEA2661283	Copadichromis_virginalis_Malombe_Lake_SAMEA2661283	Copadichromis virginalis	utaka	Mangochi (Southern Region, Malawi)	MWI_SRN_Reg_Mangochi
SAMEA2661285	Copadichromis_virginalis_Malombe_Lake_SAMEA2661285	Copadichromis virginalis	utaka	Mangochi (Southern Region, Malawi)	MWI_SRN_Reg_Mangochi
SAMEA2661287	Placidochromis_subocularis_Nanchengwa_Lodge_SAMEA2661287	Placidochromis subocularis	shallow_benthic	Mangochi (Southern Region, Malawi)	MWI_SRN_Reg_Mangochi
SAMEA2661288	Placidochromis_subocularis_Nanchengwa_Lodge_SAMEA2661288	Placidochromis subocularis	shallow_benthic	Mangochi (Southern Region, Malawi)	MWI_SRN_Reg_Mangochi
SAMEA2661289	Placidochromis_subocularis_Nanchengwa_Lodge_SAMEA2661289	Placidochromis subocularis	shallow_benthic	Mangochi (Southern Region, Malawi)	MWI_SRN_Reg_Mangochi
SAMEA2661290	Placidochromis_subocularis_Nanchengwa_Lodge_SAMEA2661290	Placidochromis subocularis	shallow_benthic	Mangochi (Southern Region, Malawi)	MWI_SRN_Reg_Mangochi
SAMEA2661381	Astatotilapia_calliptera_Chitimba	Astatotilapia calliptera	Astatotilapia_calliptera	Karonga (Northern Region, Malawi)	MWI_NRN_Reg_Karonga
SAMEA2661382	Astatotilapia_calliptera_North_Rukuru	Astatotilapia calliptera	Astatotilapia_calliptera	Karonga (Northern Region, Malawi)	MWI_NRN_Reg_Karonga
SAMEA2661383	Astatotilapia_calliptera_Songwe_River	Astatotilapia calliptera	Astatotilapia_calliptera	Mbeya Region (southwestern Tanzania)	TZA_SW_Mbeya
SAMEA2661384	Astatotilapia_calliptera_South_Rukuru	Astatotilapia calliptera	Astatotilapia_calliptera	Mzimba (Northern Region, Malawi)	MWI_NRN_Reg_Mzimba
SAMEA2661385	Astatotilapia_calliptera_Enukweni	Astatotilapia calliptera	Astatotilapia_calliptera	Mzimba (Northern Region, Malawi)	MWI_NRN_Reg_Mzimba
SAMEA2661386	Astatotilapia_calliptera_Chidya_Lake	Astatotilapia calliptera	Astatotilapia_calliptera	Mtwara Region (southeastern Tanzania)	TZA_SE_Mtwara_Reg
SAMEA2661387	Astatotilapia_calliptera_Kitai_Dam	Astatotilapia calliptera	Astatotilapia_calliptera	Ruvuma River (southeastern Tanzania)	TZA_SE_Ruvuma_Riv
SAMEA2661388	Astatotilapia_calliptera_Upper_Rovuma	Astatotilapia calliptera	Astatotilapia_calliptera	Ruvuma River (southeastern Tanzania)	TZA_SE_Ruvuma_Riv
SAMEA2661389	Astatotilapia_calliptera_Kyela	Astatotilapia calliptera	Astatotilapia_calliptera	Mbeya Region (southwestern Tanzania)	TZA_SW_Mbeya
SAMEA2661390	Astatotilapia_calliptera_Luwawa_Dam	Astatotilapia calliptera	Astatotilapia_calliptera	Mzimba (Northern Region, Malawi)	MWI_NRN_Reg_Mzimba
SAMEA2661391	Astatotilapia_calliptera_Bua_River	Astatotilapia calliptera	Astatotilapia_calliptera	Nkhotakota (Central Region, Malawi)	MWI_CNTRL_Reg_Nkhotakota
SAMEA3388853	Rhamphochromis_longiceps_Metangula	Rhamphochromis longiceps	Rhamphochromis	Metangula (northern Mozambique)	MOZ_NRN_Metangula
SAMEA3388854	Stigmatochromis_guttatus_Cape_Maclear	Stigmatochromis macrorhynchos	shallow_benthic	Mangochi (Southern Region, Malawi)	MWI_SRN_Reg_Mangochi
SAMEA3388855	Tyrannochromis_nigriventer_Minos_Reef	Tyrannochromis nigriventer	shallow_benthic	Metangula (northern Mozambique)	MOZ_NRN_Metangula
SAMEA3388856	Rhamphochromis_woodi_Nkhata_Bay	Rhamphochromis woodi	Rhamphochromis	Nkhata Bay (Northern Region, Malawi)	MWI_NRN_Reg_Nkhata_Bay
SAMEA3388857	Taeniochromis_holotaenia_Metangula	Taeniochromis holotaenia	shallow_benthic	Metangula (northern Mozambique)	MOZ_NRN_Metangula
SAMEA3388858	Taeniolethrinops_macrorhynchus_Chiwanga	Taeniolethrinops praeorbitalis	shallow_benthic	Chitipa (Northern Region, Malawi)	MWI_NRN_Reg_Chitipa
SAMEA3388859	Dimidiochromis_kiwinge_Metangula	Dimidiochromis kiwinge	shallow_benthic	Metangula (northern Mozambique)	MOZ_NRN_Metangula
SAMEA3388860	Taeniolethrinops_praeorbitalis_Mangochi	Taeniolethrinops praeorbitalis	shallow_benthic	Mangochi (Southern Region, Malawi)	MWI_SRN_Reg_Mangochi
SAMEA3388862	Mylochromis_ericotaenia_Cape_Maclear	Mylochromis ericotaenia	shallow_benthic	Mangochi (Southern Region, Malawi)	MWI_SRN_Reg_Mangochi
SAMEA3388863	Stigmatochromis_modestus_Cape_Maclear	Stigmatochromis modestus	shallow_benthic	Mangochi (Southern Region, Malawi)	MWI_SRN_Reg_Mangochi
SAMEA3388864	Hemitilapia_oxyrhynchus_Mangochi_SAMEA3388864	Hemitilapia oxyrhyncha	shallow_benthic	Mangochi (Southern Region, Malawi)	MWI_SRN_Reg_Mangochi
SAMEA3388867	Haplochromis_tweddlei_Chiuta_Lake	Astatotilapia tweddlei	Astatotilapia_outgroup	Machinga (Southern Region, Malawi)	MWI_SRN_Reg_Machinga
SAMEA3388868	Taeniolethrinops_furcicauda_Metangula	Taeniolethrinops furcicauda	shallow_benthic	Metangula (northern Mozambique)	MOZ_NRN_Metangula
SAMEA3388870	Dimidiochromis_strigatus_Mangochi	Dimidiochromis strigatus	shallow_benthic	Mangochi (Southern Region, Malawi)	MWI_SRN_Reg_Mangochi
SAMEA3388871	Pallidochromis_tokolosh_Southeast_Arm	Pallidochromis tokolosh	Diplotaxodon	Mangochi (Southern Region, Malawi)	MWI_SRN_Reg_Mangochi
SAMEA3388872	Otopharynx_lithobates_Cape_Maclear	Otopharynx lithobates	shallow_benthic	Mangochi (Southern Region, Malawi)	MWI_SRN_Reg_Mangochi
SAMEA3388873	Rhamphochromis_esox_Tukombo	Rhamphochromis esox	Rhamphochromis	Nkhata Bay (Northern Region, Malawi)	MWI_NRN_Reg_Nkhata_Bay
SAMEA3388874	Maylandia_zebra_Matema	Maylandia zebra	mbuna	Mbeya Region (southwestern Tanzania)	TZA_SW_Mbeya
SAMEA3388875	Astatotilapia_calliptera_Lower_Itupi_SAMEA3388875	Astatotilapia calliptera	Astatotilapia_calliptera	Mbeya Region (southwestern Tanzania)	TZA_SW_Mbeya
SAMEA3388876	Astatotilapia_calliptera_Lower_Itupi_SAMEA3388876	Astatotilapia calliptera	Astatotilapia_calliptera	Mbeya Region (southwestern Tanzania)	TZA_SW_Mbeya
SAMEA3388877	Astatotilapia_calliptera_Lower_Itupi_SAMEA3388877	Astatotilapia calliptera	Astatotilapia_calliptera	Mbeya Region (southwestern Tanzania)	TZA_SW_Mbeya
SAMEA3388878	Astatotilapia_calliptera_Upper_Itupi	Astatotilapia calliptera	Astatotilapia_calliptera	Mbeya Region (southwestern Tanzania)	TZA_SW_Mbeya
SAMEA3480882	Hemitaeniochromis_spilopterus_Liwonde	Protomelas spilopterus	shallow_benthic	Machinga (Southern Region, Malawi)	MWI_SRN_Reg_Machinga
SAMEA6147764	Astatotilapia_blue_Rufiji_River_SAMEA6147764	Astatotilapia sp. 'Blue Rufiji'	Astatotilapia_outgroup	Rufiji River (southern Tanzania)	TZA_SRN_Rufiji_Ruaha_Riv
SAMEA6147765	Astatotilapia_large_yellow_Rukwa_Lake	Astatotilapia sp. 'rukwa large yellow'	Astatotilapia_outgroup	Rukwa Valley (southwestern Tanzania)	TZA_SW_Rukwa_Valley
SAMEA6147767	Astatotilapia_sunset_Rukwa_Lake	Astatotilapia sp. 'rukwa sunset'	Astatotilapia_outgroup	Rukwa Valley (southwestern Tanzania)	TZA_SW_Rukwa_Valley
SAMEA6147768	Astatotilapia_blue_Rukwa_Lake	Astatotilapia sp. 'rukwa blue'	Astatotilapia_outgroup	Rukwa Valley (southwestern Tanzania)	TZA_SW_Rukwa_Valley
SAMEA6147769	Astatotilapia_blue_Ruaha_River	Astatotilapia sp. 'Ruaha'	Astatotilapia_outgroup	Ruaha River (south-central Tanzania)	TZA_SRN_Rufiji_Ruaha_Riv
SAMEA6147770	Astatotilapia_blue_Rufiji_River_SAMEA6147770	Astatotilapia sp. 'Blue Rufiji'	Astatotilapia_outgroup	Rufiji River (southern Tanzania)	TZA_SRN_Rufiji_Ruaha_Riv
SAMEA6147771	Astatotilapia_longfin_yellow_Ruaha_River	Astatotilapia sp. 'longfin yellow'	Astatotilapia_outgroup	Ruaha River (south-central Tanzania)	TZA_SRN_Rufiji_Ruaha_Riv
SAMEA6147772	Astatotilapia_red_cheek_Ruaha_River	Astatotilapia sp. 'red chest'	Astatotilapia_outgroup	Ruaha River (south-central Tanzania)	TZA_SRN_Rufiji_Ruaha_Riv
